# Supplementary material for: Lifespan Extension of Podospora anserina Mic60-Subcomplex Mutants Depends on Cardiolipin Remodeling
Source: MDPI journal article supplement (doi:10.3390/ijms23094741), 2022-04-25
Supplement: s1 [file s1]

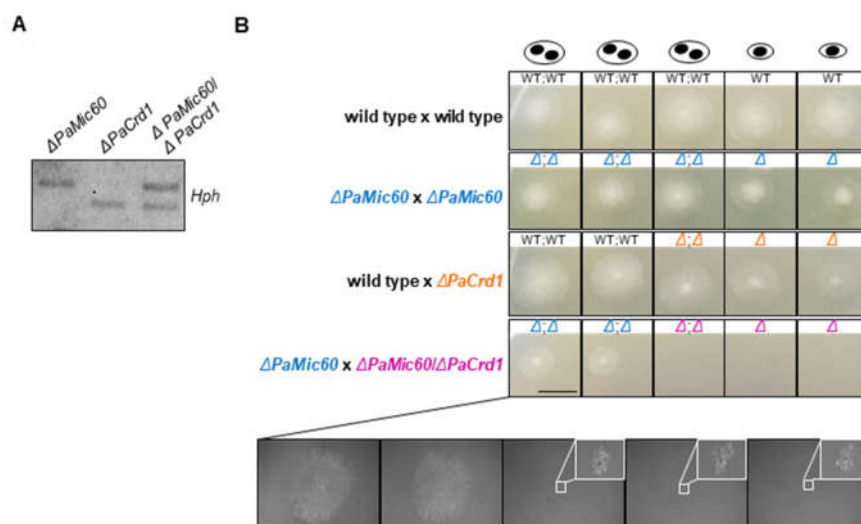

**Figure S1:** Southern blot verification and germination analysis of  $\Delta PaMic60/\Delta PaCrd1$ . **(A)** Southern blot analysis with EcoRV-digested DNA to verify the newly generated double mutant  $\Delta PaMic60/\Delta PaCrd1$  by the use of the hygromycin (*Hph*) resistance gene. **(B)** Comparison of germinated spores of crossing two wild-type strains (WT, black) or two  $\Delta PaMic60$  strains (blue), of a cross of  $\Delta PaCrd1$  (orange) with the wild type, and of a cross of  $\Delta PaMic60/\Delta PaCrd1$  (violet) with  $\Delta PaMic60$ . Ascospores were germinated on BMM with 60 mM ammonium acetate for 2 days at 27 °C in the dark. Normally, *P. anserina* forms asci with four spores each of them containing two different nuclei giving rise to heterokaryotic mycelia. For experimental purposes monokaryotic spores are preferred, which rarely are present in so-called "irregular asci". Here, irregular asci with five spores, consisting of 3 dikaryotic and 2 monokaryotic spores were used [60]. 'WT' or 'Δ' in the respective colors indicate the genotype of each nucleus in a spore. Isolated spores, either di- or monokaryotic, of the  $\Delta PaMic60/\Delta PaCrd1$  double mutant germinate poorly due to a germination defect. The last horizontal row shows a magnification of the spores of the  $\Delta PaMic60/\Delta PaCrd1 \times \Delta PaMic60$  cross. The inlay presents an additional magnification to visualize the spores with  $\Delta PaMic60/\Delta PaCrd1$  genotype. After initial formation of germination tubes, growth of the double mutant completely stops. Scale bar = 1 cm.

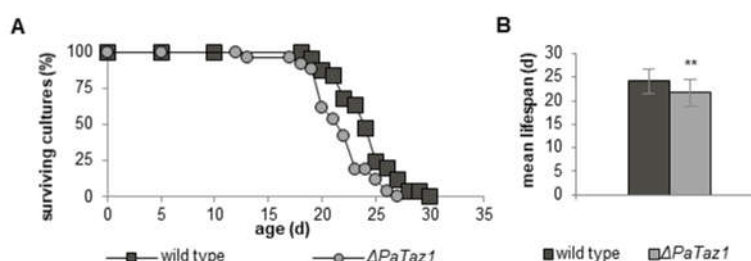

**Figure S2:** Loss of PaTAZ1 affects lifespan of *P. anserina*. **(A)** Survival curves of wild type ( $n = 25$ ) and  $\Delta PaTaz1$  ( $n = 26$ ) grown on M2 medium. **(B)** Mean lifespan of cultures from (A). Data represent mean  $\pm$  SD. \*\*  $p < 0.01$ .

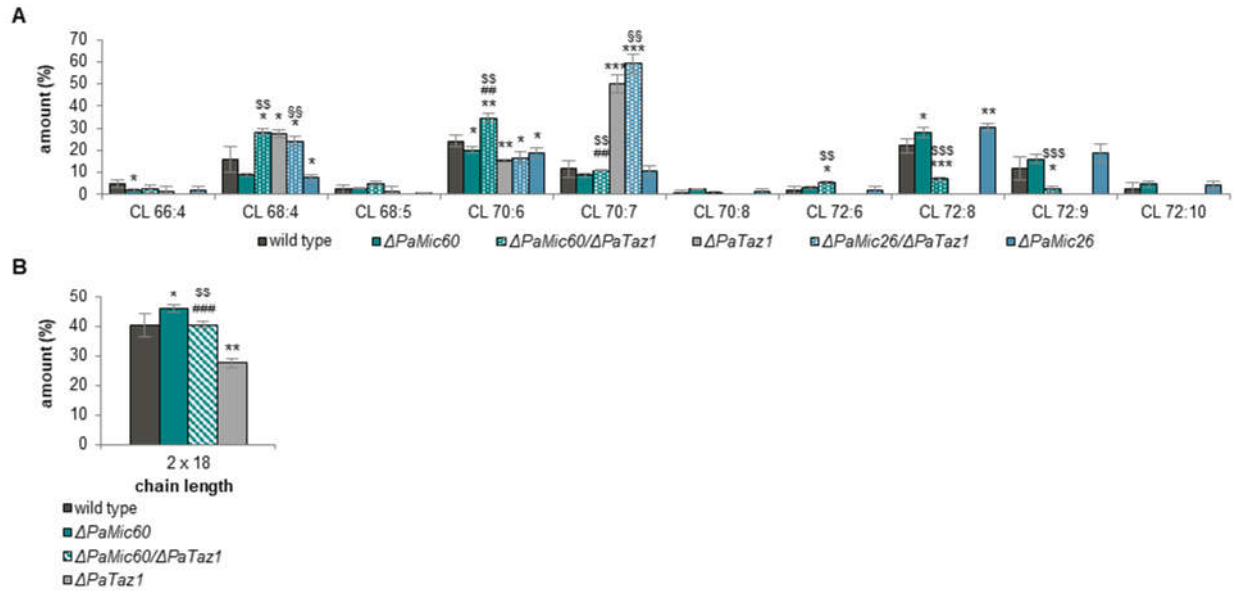

**Figure S3:** Ablation of PaMIC60 and PaTAZ1 alters CL species and amount of 18-chained acyl residues incorporated into membrane lipids. (A) Different CL species in wild type,  $\Delta PaMic60$ ,  $\Delta PaMic60/\Delta PaTaz1$ ,  $\Delta PaTaz1$ ,  $\Delta PaMic26/\Delta PaTaz1$ , and  $\Delta PaMic26$  according to total length of all four acyl chains (66-72) and total degree of unsaturation (4-10). The most abundant CL species are represented. (B) Alterations in the amount of 18-chained acyl residues across all identified lipid classes in wild type,  $\Delta PaMic60$ ,  $\Delta PaMic60/\Delta PaTaz1$ , and  $\Delta PaTaz1$ . \* Significant differences to wild type, \*  $p < 0.05$  \*\*  $p < 0.01$  \*\*\*  $p < 0.001$ ; # significant differences to  $\Delta PaTaz1$ , ##  $p < 0.01$ ; § significant differences to  $\Delta PaMic60$ , §§  $p < 0.01$ , §§§  $p < 0.001$ ; § significant differences to  $\Delta PaMic26$ , §  $p < 0.05$ , §§  $p < 0.01$ .

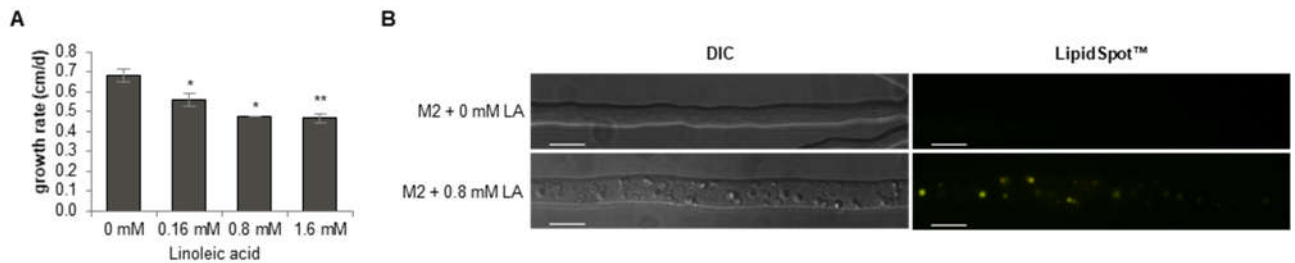

**Figure S4:** Growth tests and appearance of lipid droplets after supplementation with linoleic acid (LA). (A) Growth tests of the wild type ( $n = 3$ ) grown on M2 medium with or without different concentrations of LA. Data represent mean  $\pm$  SD. \*  $p < 0.05$ , \*\*  $p < 0.01$ . (B) Staining of wild type grown on M2 medium with or without 0.8 mM LA for one day. Visualization was performed using LipidSpot™. Scale bar = 10  $\mu$ m.

**Table S4:** Overview of lifespan and growth rate of wild type,  $\Delta PaTaz1$ ,  $\Delta PaMic60$ , and  $\Delta PaMic60/\Delta PaTaz1$  mutants. The  $p$ -values were determined with SPSS (IBM; SPSS Statistics, New York, USA) with three different tests. Indicated are the  $p$ -values of the lifespan curves in comparison to the wild type. “ $p$ -value 1” = Log Rank (Mantel-Cox); “ $p$ -value 2” = Breslow (Generalized Wilcoxon); “ $p$ -value 3” = Tarone-Ware. Moreover,  $p$ -values of the lifespan curves compared to  $\Delta PaMic60$ . “ $p$ -value 4” = Log Rank (Mantel-Cox); “ $p$ -value 5” = Breslow (Generalized Wilcoxon); “ $p$ -value 6” = Tarone-Ware. And  $p$ -values of the lifespan curves compared to  $\Delta PaTaz1$ . “ $p$ -value 7” = Log Rank (Mantel-Cox); “ $p$ -value 8” = Breslow (Generalized Wilcoxon); “ $p$ -value 9” = Tarone-Ware.

|                             | wild type | $\Delta PaTaz1$ | $\Delta PaMic60$ | $\Delta PaMic60/\Delta PaTaz1$ |
|-----------------------------|-----------|-----------------|------------------|--------------------------------|
| <b>mean lifespan (d)</b>    | 24        | 22              | 54               | 26                             |
| <b>± SD</b>                 | ± 2.7     | ± 2.9           | ± 20.2           | ± 6.2                          |
| <b>maximum lifespan (d)</b> | 30        | 27              | 103              | 39                             |
| $p$ -value 1                | /         | 0.0062          | 1.257E-13        | 0.0107                         |
| $p$ -value 2                | /         | 0.0062          | 1.854E-11        | 0.1451                         |
| $p$ -value 3                | /         | 0.0059          | 1.632E-12        | 0.0476                         |
| $p$ -value 4                | /         | 1.001E-13       | /                | 1.772E-13                      |
| $p$ -value 5                | /         | 1.742E-11       | /                | 3.726E-11                      |
| $p$ -value 6                | /         | 1.398E-12       | /                | 2.511E-12                      |
| $p$ -value 7                | /         | /               | 1.001E-13        | 9.042E-05                      |
| $p$ -value 8                | /         | /               | 1.742E-11        | 2.264E-03                      |
| $p$ -value 9                | /         | /               | 1.398E-12        | 5.147E-04                      |
| <b>growth rate (cm/d)</b>   | 0.66      | 0.64            | 0.64             | 0.61                           |
| <b>± SD</b>                 | ± 0.03    | ± 0.02          | ± 0.02           | ± 0.02                         |
| <b>growth distance (cm)</b> | 14.0      | 11.9            | 32.6             | 14.2                           |
| <b>± SD</b>                 | ± 1.5     | ± 1.6           | ± 14.0           | ± 3.7                          |
| biological replicates       | 25        | 26              | 24               | 32                             |

**Table S5:** Overview of lifespan and growth rate of wild type,  $\Delta PaTaz1$ ,  $\Delta PaMic26$ , and  $\Delta PaMic26/\Delta PaTaz1$  mutants. The  $p$ -values were determined with SPSS (IBM; SPSS Statistics, New York, USA) with three different tests. Indicated are the  $p$ -values of the lifespan curves in comparison to the wild type. “ $p$ -value 1” = Log Rank (Mantel-Cox); “ $p$ -value 2” = Breslow (Generalized Wilcoxon); “ $p$ -value 3” = Tarone-Ware. Moreover,  $p$ -values of the lifespan curves compared to  $\Delta PaMic26$ . “ $p$ -value 4” = Log Rank (Mantel-Cox); “ $p$ -value 5” = Breslow (Generalized Wilcoxon); “ $p$ -value 6” = Tarone-Ware. And  $p$ -values of the lifespan curves compared to  $\Delta PaTaz1$ . “ $p$ -value 7” = Log Rank (Mantel-Cox); “ $p$ -value 8” = Breslow (Generalized Wilcoxon); “ $p$ -value 9” = Tarone-Ware.

|                             | wild type | $\Delta PaTaz1$ | $\Delta PaMic26$ | $\Delta PaMic26/\Delta PaTaz1$ |
|-----------------------------|-----------|-----------------|------------------|--------------------------------|
| <b>mean lifespan (d)</b>    | 24        | 21              | 53               | 34                             |
| <b>± SD</b>                 | ± 4.1     | ± 3.9           | ± 13.2           | ± 11.8                         |
| <b>maximum lifespan (d)</b> | 32        | 29              | 85               | 64                             |
| $p$ -value 1                | /         | 0.0032          | 4.383E-20        | 1.025E-07                      |
| $p$ -value 2                | /         | 0.0093          | 5.545E-18        | 2.821E-06                      |
| $p$ -value 3                | /         | 0.0050          | 5.039E-19        | 5.277E-07                      |
| $p$ -value 4                | /         | 3.320E-21       | /                | 5.246E-10                      |
| $p$ -value 5                | /         | 9.761E-19       | /                | 4.513E-10                      |
| $p$ -value 6                | /         | 5.843E-20       | /                | 3.078E-10                      |
| $p$ -value 7                | /         | /               | 3.320E-21        | 1.765E-12                      |
| $p$ -value 8                | /         | /               | 9.761E-19        | 3.807E-10                      |
| $p$ -value 9                | /         | /               | 5.843E-20        | 2.750E-11                      |
| <b>growth rate (cm/d)</b>   | 0.66      | 0.63            | 0.67             | 0.62                           |
| <b>± SD</b>                 | ± 0.02    | ± 0.03          | ± 0.06           | ± 0.04                         |
| <b>growth distance (cm)</b> | 13.6      | 11.8            | 33.1             | 19.3                           |
| <b>± SD</b>                 | ± 2.8     | ± 2.6           | ± 8.9            | ± 7.2                          |
| biological replicates       | 24        | 27              | 43               | 50                             |

**Table S6:** Overview of lifespan and growth rate of wild type,  $\Delta PaTaz1$ ,  $\Delta PaMic60$ , and  $\Delta PaMic60/\Delta PaTaz1$  mutants with and without linoleic acid. The  $p$ -values were determined with SPSS (IBM; SPSS Statistics, New York, USA) with three different tests. Indicated are the  $p$ -values of the lifespan curves in comparison to the wild type without linoleic acid. “ $p$ -value 1” = Log Rank (Mantel-Cox); “ $p$ -value 2” = Breslow (Generalized Wilcoxon); “ $p$ -value 3” = Tarone-Ware. Additionally,  $p$ -values of the lifespan curves compared to the corresponding deletion mutant without linoleic acid are given. “ $p$ -value 4” = Log Rank (Mantel-Cox); “ $p$ -value 5” = Breslow (Generalized Wilcoxon); “ $p$ -value 6” = Tarone-Ware.

|                             | wild type          | $\Delta PaTaz1$ | $\Delta PaMic60$ | $\Delta PaMic60/\Delta PaTaz1$ | wild type            | $\Delta PaTaz1$ | $\Delta PaMic60$ | $\Delta PaMic60/\Delta PaTaz1$ |
|-----------------------------|--------------------|-----------------|------------------|--------------------------------|----------------------|-----------------|------------------|--------------------------------|
|                             | 0 mM linoleic acid |                 |                  |                                | 0.8 mM linoleic acid |                 |                  |                                |
| <b>mean lifespan (d)</b>    | 25                 | 24              | 59               | 27                             | 20                   | 19              | 46               | 42                             |
| <b>± SD</b>                 | ± 2.3              | ± 1.7           | ± 22.1           | ± 4.6                          | ± 3.0                | ± 6.7           | ± 14.5           | ± 16.7                         |
| <b>maximum lifespan (d)</b> | 30                 | 27              | 103              | 34                             | 26                   | 27              | 75               | 74                             |
| $p$ -value 1                | /                  | 0.0682          | 1.702E-09        | 0.0228                         | 6.692E-04            | 0.0051          | 2.037E-07        | 5.291E-06                      |
| $p$ -value 2                | /                  | 0.0950          | 4.898E-08        | 0.1259                         | 1.907E-04            | 0.0032          | 3.394E-06        | 2.021E-04                      |
| $p$ -value 3                | /                  | 0.0816          | 9.333E-09        | 0.0584                         | 3.132E-04            | 0.0037          | 8.503E-07        | 3.514E-05                      |
| $p$ -value 4                | /                  | /               | /                | /                              | /                    | 0.2192          | 0.0966           | 3.695E-05                      |
| $p$ -value 5                | /                  | /               | /                | /                              | /                    | 0.1014          | 0.1413           | 7.071E-04                      |
| $p$ -value 6                | /                  | /               | /                | /                              | /                    | 0.1418          | 0.1264           | 1.684E-04                      |
| <b>growth rate (cm/d)</b>   | 0.65               | 0.64            | 0.63             | 0.62                           | 0.46                 | 0.48            | 0.44             | 0.41                           |
| <b>± SD</b>                 | ± 0.02             | ± 0.02          | ± 0.02           | ± 0.02                         | ± 0.02               | ± 0.02          | ± 0.02           | ± 0.02                         |
| <b>growth distance (cm)</b> | 14.4               | 12.9            | 36.2             | 14.9                           | 7.7                  | 7.5             | 19.1             | 16.5                           |
| <b>± SD</b>                 | ± 1.1              | ± 0.8           | ± 15.5           | ± 2.8                          | ± 1.2                | ± 3.2           | ± 6.4            | ± 6.7                          |
| biological replicates       | 17                 | 14              | 16               | 20                             | 15                   | 15              | 14               | 15                             |
